# Supplementary material for: Local Dynamics of Collaboration for Maternal, Newborn and Child Health: A Social Network Analysis of Healthcare Providers and Their Managers in Gert Sibande District, South Africa
Source: PubMed Central journal article supplement (PMC9808286; doi:10.34172/ijhpm.2021.106), 2021-09-08
Supplement: ijhpm-11-2135-s001.pdf [file ijhpm-11-2135-s001.pdf]

## Social Network Analysis Survey

---

**Article title:** Local Dynamics of Collaboration for Maternal, Newborn and Child Health: A Social Network Analysis of Healthcare Providers and Their Managers in Gert Sibande District, South Africa

**Journal name:** International Journal of Health Policy and Management (IJHPM)

**Authors’ information:** Fidele Kanyimbu Mukinda<sup>1\*</sup>, Sara Van Belle<sup>2</sup>, Helen Schneider<sup>1,3</sup>

<sup>1</sup>School of Public Health, University of the Western Cape, Cape Town, South Africa.

<sup>2</sup>Institute of Tropical Medicine, Antwerp, Belgium.

<sup>3</sup>South African Medical Research Council Health Services to Systems Unit, University of the Western Cape, Cape Town, South Africa.

(\*Corresponding author: [fmukinda@uwc.ac.za](mailto:fmukinda@uwc.ac.za))

### Supplementary file 1. Social Network Analysis Survey

#### Introduction

The interviews and field observation we recently had in the district regarding “Accountability for Maternal, Newborn, and Child Health (MNCH)” indicated the need to communicate better and more effectively among actors involved in MNCH processes. We hope that doing some baseline analysis using social network analysis will help us identify what we could do to improve communication, especially in regard to collaboration between all the actors involved in MNCH.

I’m requesting you take some time to provide your input on these questions and send the completed questionnaire to [fmukinda@uwc.ac.za](mailto:fmukinda@uwc.ac.za) (or hand it in directly) for analysis (**preferably before 15 July, but sooner would be better**). This should take about 20 minutes of your valuable time to complete.

In this social network analysis, we will try to map the networks for communication, information, problem solving, advice, and support among actors involved with MNCH through Perinatal (PIIP/CHIP) and the Monitoring and Response Unit (MRU) in the District. Social network analysis is useful in visually presenting the relationships between actors (by producing a graph similar to the one at the last page).

#### Consent

Participation in this study is voluntary, and you may choose not to participate or withdraw your participation in this study at any time. Please note that your answers are confidential. Results that identify you by name will be kept within the research team. In the network maps the names will be replaced with anonymous codes. **If you request**, we will provide you with direct, individualised feedback showing your position in the social network of your district/sub-district.

If you agree to participate in this study you will be asked to answer questions about the people you interact with as well as some background information about you. To map out who communicates with whom, we will request you to give your name in completing this questionnaire.

I’m looking forward to see what we can learn.

Thank you

Dr Fidele Mukinda

### Your Consent

I have read, and understood the introduction and the consent parts of this questionnaire. I understand the aim of the research project and what I will be asked to do. I understand that I may stop my participation in this study at any time and that I can refuse to answer any questions.

I also understand that if I take part in the Social Network Analysis I will be required to provide my name which will be replaced with a code.

|                           |                                 |
|---------------------------|---------------------------------|
| My Decision: I choose to: |                                 |
| 1                         | Participate in the study        |
| 2                         | Not to participate in the study |

### Part One: Social Network Analysis

Your answers to the questions in this first part will allow us to map the network of communication in your Sub-district/District.

|                        |
|------------------------|
| Q1. What is your name? |
|                        |

|                                                                       |     |
|-----------------------------------------------------------------------|-----|
| Q2. Where do you work in the District?                                | [x] |
| <input type="checkbox"/> District Office                              |     |
| <input type="checkbox"/> Sub-district 1                               |     |
| <input type="checkbox"/> Sub-district 2                               |     |
| <input type="checkbox"/> District Hospital ( <i>Please specify</i> ): |     |
| <input type="checkbox"/> Clinic (CHC) ( <i>Please specify</i> ):      |     |
| <input type="checkbox"/> Other ( <i>Please specify</i> )              |     |

Q3. In this question, you are presented with a list of people involved in Perinatal or MRU meetings from the District Office, Sub-district 1 and Sub-district 2, and you are requested to please mark with [X] the person you know (Q3)?

[Note: Could you please add names of any person you know that is missing on the list. You can use the next page if you need more space]

| Q3: I know this person [Check all that apply] |  |  |                 |  |  |                 |  |  |                 |  |  |
|-----------------------------------------------|--|--|-----------------|--|--|-----------------|--|--|-----------------|--|--|
| District Office                               |  |  | Sub-district 1  |  |  |                 |  |  | Sub-district 2  |  |  |
| Name 1                                        |  |  | Name 1          |  |  | Name 1          |  |  | Name 1          |  |  |
| Name 2                                        |  |  | Name 2          |  |  | Name 2          |  |  | Name 2          |  |  |
| Name 3                                        |  |  | Name 3          |  |  | Name 3          |  |  | Name 3          |  |  |
| Name 4                                        |  |  | Name 4          |  |  | Name 4          |  |  | Name 4          |  |  |
|                                               |  |  |                 |  |  |                 |  |  |                 |  |  |
| Other (Specify)                               |  |  | Other (Specify) |  |  | Other (Specify) |  |  | Other (Specify) |  |  |
| Other (Specify)                               |  |  | Other (Specify) |  |  | Other (Specify) |  |  | Other (Specify) |  |  |

In the next question (Q4) you are presented with the same list of names of people involved in Perinatal or MRU meetings in GS (District Office/ Sub-district 1/ Sub-district 2); you are asked to rate your interactions with each person.

[Note: Please add any other name (Name, title, facility) that is not listed]

| Q4: How often do you communicate with each person regarding MNCH issues?                                  |                           |           |
|-----------------------------------------------------------------------------------------------------------|---------------------------|-----------|
| 0 = Never    1 = Once a quarter    2 = Monthly    3 = Weekly    4 = Daily    99 = I don't know the person |                           |           |
| Your answers [Please mark with the corresponding number in each cell]                                     |                           |           |
| District Office/ Sub-district 1/<br>Sub-district 2                                                        |                           | <b>Q4</b> |
|                                                                                                           | Name 1                    |           |
|                                                                                                           | Name 2                    |           |
|                                                                                                           | Name 3 ...                |           |
|                                                                                                           | Other (Name, title, role) |           |
|                                                                                                           | Other (Name, title, role) |           |

In the next questions (Q5-Q9) you are presented with the same list of names of people involved in Perinatal or MRU meetings from the **District/Sub-district 1/sub-district 2**, and you are asked to mark with an [X] those related to each question. *[Please select ALL that apply]*

|                                                       | List of people            | Q5: I receive feedback from this person? | Q6: I feel personally comfortable asking this person for advice on work-related matters. | Q7: Whom do you turn to for help in solving a problem in your work? | Q8: Who do you turn to for support on personal matters? | Q9: Whom are you likely to turn to discuss a new innovative idea? |
|-------------------------------------------------------|---------------------------|------------------------------------------|------------------------------------------------------------------------------------------|---------------------------------------------------------------------|---------------------------------------------------------|-------------------------------------------------------------------|
|                                                       |                           | <i>(mark with X)</i>                     | <i>(mark with X)</i>                                                                     | <i>(mark with X)</i>                                                | <i>(mark with X)</i>                                    | <i>(mark with X)</i>                                              |
| District Office/<br>Sub-district 1/<br>Sub-district 2 | Name 1                    |                                          |                                                                                          |                                                                     |                                                         |                                                                   |
|                                                       | Name 2                    |                                          |                                                                                          |                                                                     |                                                         |                                                                   |
|                                                       | Name 3 ...                |                                          |                                                                                          |                                                                     |                                                         |                                                                   |
|                                                       |                           |                                          |                                                                                          |                                                                     |                                                         |                                                                   |
|                                                       | Other (Name, title, role) |                                          |                                                                                          |                                                                     |                                                         |                                                                   |
|                                                       | Other (Name, title, role) |                                          |                                                                                          |                                                                     |                                                         |                                                                   |

## Part Two: Background

1. What is your sex?

|                                 |   |
|---------------------------------|---|
| <input type="checkbox"/> Female | 1 |
| <input type="checkbox"/> Male   | 2 |

2. Which age group (in years) do you fit into?

|                                       |   |
|---------------------------------------|---|
| <input type="checkbox"/> Less than 20 | 1 |
| <input type="checkbox"/> 20 to 30     | 2 |
| <input type="checkbox"/> 31 to 40     | 3 |
| <input type="checkbox"/> 41 to 50     | 4 |
| <input type="checkbox"/> 51 to 60     | 5 |
| <input type="checkbox"/> More than 60 | 6 |

3. How long have you worked for the Department of Health? .....

4. What is your current position? (Mark with X) [Choose all that apply]

|                                                          |  |                                                     |  |
|----------------------------------------------------------|--|-----------------------------------------------------|--|
| <input type="checkbox"/> CEO                             |  | <input type="checkbox"/> Social worker              |  |
| <input type="checkbox"/> Nursing Manager                 |  | <input type="checkbox"/> Hospital Board chairperson |  |
| <input type="checkbox"/> Medical Manager                 |  | <input type="checkbox"/> DD MCWYH Coordinator       |  |
| <input type="checkbox"/> Corporate manager               |  | <input type="checkbox"/> DD Nutrition services      |  |
| <input type="checkbox"/> Sub-district PHC manager        |  | <input type="checkbox"/> PMTCT Coordinator          |  |
| <input type="checkbox"/> Operational Manager Maternity   |  | <input type="checkbox"/> DCST (Midwife)             |  |
| <input type="checkbox"/> Operational Manager Paediatrics |  | <input type="checkbox"/> DCST (Paeds)               |  |
| <input type="checkbox"/> Operational Manager Clinic/CHC  |  | <input type="checkbox"/> DCST (O&G)                 |  |
| <input type="checkbox"/> Professional Nurse              |  | <input type="checkbox"/> Quality assurance Manager  |  |
| <input type="checkbox"/> Medical (Paeds)                 |  | <input type="checkbox"/> Pharmacist (District)      |  |
| <input type="checkbox"/> Medical (O&G)                   |  | <input type="checkbox"/> Union Representative       |  |
| <input type="checkbox"/> Medical (Comm Serv)             |  | <input type="checkbox"/> WBOT                       |  |
| <input type="checkbox"/> EMS (Sp)                        |  | <input type="checkbox"/> Other (Please specify)     |  |
| <input type="checkbox"/> Allied Health Manager           |  | <input type="checkbox"/> Other (Please specify)     |  |
| <input type="checkbox"/> Dietician                       |  | <input type="checkbox"/> Other (Please specify)     |  |
| <input type="checkbox"/> Nutritionist                    |  | <input type="checkbox"/> Other (Please specify)     |  |

5. How long have you worked in this position (Q3)?

|                                                       |   |
|-------------------------------------------------------|---|
| <input type="checkbox"/> Less than 6 months           | 1 |
| <input type="checkbox"/> 6 months to less than 1 year | 2 |
| <input type="checkbox"/> 1 – 3 years                  | 3 |
| <input type="checkbox"/> 4 – 7 years                  | 4 |
| <input type="checkbox"/> 8 – 10 years                 | 5 |
| <input type="checkbox"/> Over 10 years                | 6 |

6. Please indicate whether this position is:

|                                           |   |
|-------------------------------------------|---|
| <input type="checkbox"/> Permanent        | 1 |
| <input type="checkbox"/> Acting/delegated | 2 |
| <input type="checkbox"/> Other (Specify): | 3 |

7. Do you [actively] attend this meeting? [Mark with X]

|                                                | Yes | No |
|------------------------------------------------|-----|----|
| <input type="checkbox"/> MRU                   |     |    |
| <input type="checkbox"/> Perinatal (CHIP/PPIP) |     |    |

8. Do you think the Monitoring and Response Unit (MRU) is important in strengthening accountability for maternal, newborn and child health?

|                                                    |   |
|----------------------------------------------------|---|
| <input type="checkbox"/> Have not heard of the MRU | 1 |
| <input type="checkbox"/> Not at all important      | 2 |
| <input type="checkbox"/> Low importance            | 3 |
| <input type="checkbox"/> Neutral                   | 4 |
| <input type="checkbox"/> Moderately important      | 5 |
| <input type="checkbox"/> Very important            | 6 |

9. Do you think the perinatal meeting (PPIP & CHIP) is important in strengthening accountability for maternal, newborn and child health?

|                                               |   |
|-----------------------------------------------|---|
| <input type="checkbox"/> I Don't know         | 1 |
| <input type="checkbox"/> Not at all important | 2 |
| <input type="checkbox"/> Low importance       | 3 |
| <input type="checkbox"/> Neutral              | 4 |
| <input type="checkbox"/> Moderately important | 5 |
| <input type="checkbox"/> Very important       | 6 |

10. **INTERESTS:** What are you interested in the most within MNCH? *[Please choose all that apply]*

|                                                 |   |
|-------------------------------------------------|---|
| <input type="checkbox"/> Perinatal health       | 1 |
| <input type="checkbox"/> Neonatal health        | 2 |
| <input type="checkbox"/> Child health           | 3 |
| <input type="checkbox"/> Nutrition/Malnutrition | 4 |
| <input type="checkbox"/> Maternal health        | 5 |
| <input type="checkbox"/> Other (Specify)        | 6 |

11. **SATISFACTION:** Overall, how satisfied or dissatisfied are you with your experience with accountability processes regarding MNCH

|                                                             |   |
|-------------------------------------------------------------|---|
| <input type="checkbox"/> Very dissatisfied                  | 1 |
| <input type="checkbox"/> Dissatisfied                       | 2 |
| <input type="checkbox"/> Neither dissatisfied nor satisfied | 3 |
| <input type="checkbox"/> Satisfied                          | 4 |
| <input type="checkbox"/> Very satisfied                     | 5 |

## Conclusion & Thank You

Thank you for taking part in this research project and for answering the questions. Your contribution is very much appreciated. Please be assured that your answers will be treated with strict confidence. A feedback session will be held once all data are analyzed.

Example of Social Network Analysis Graph<sup>1</sup>

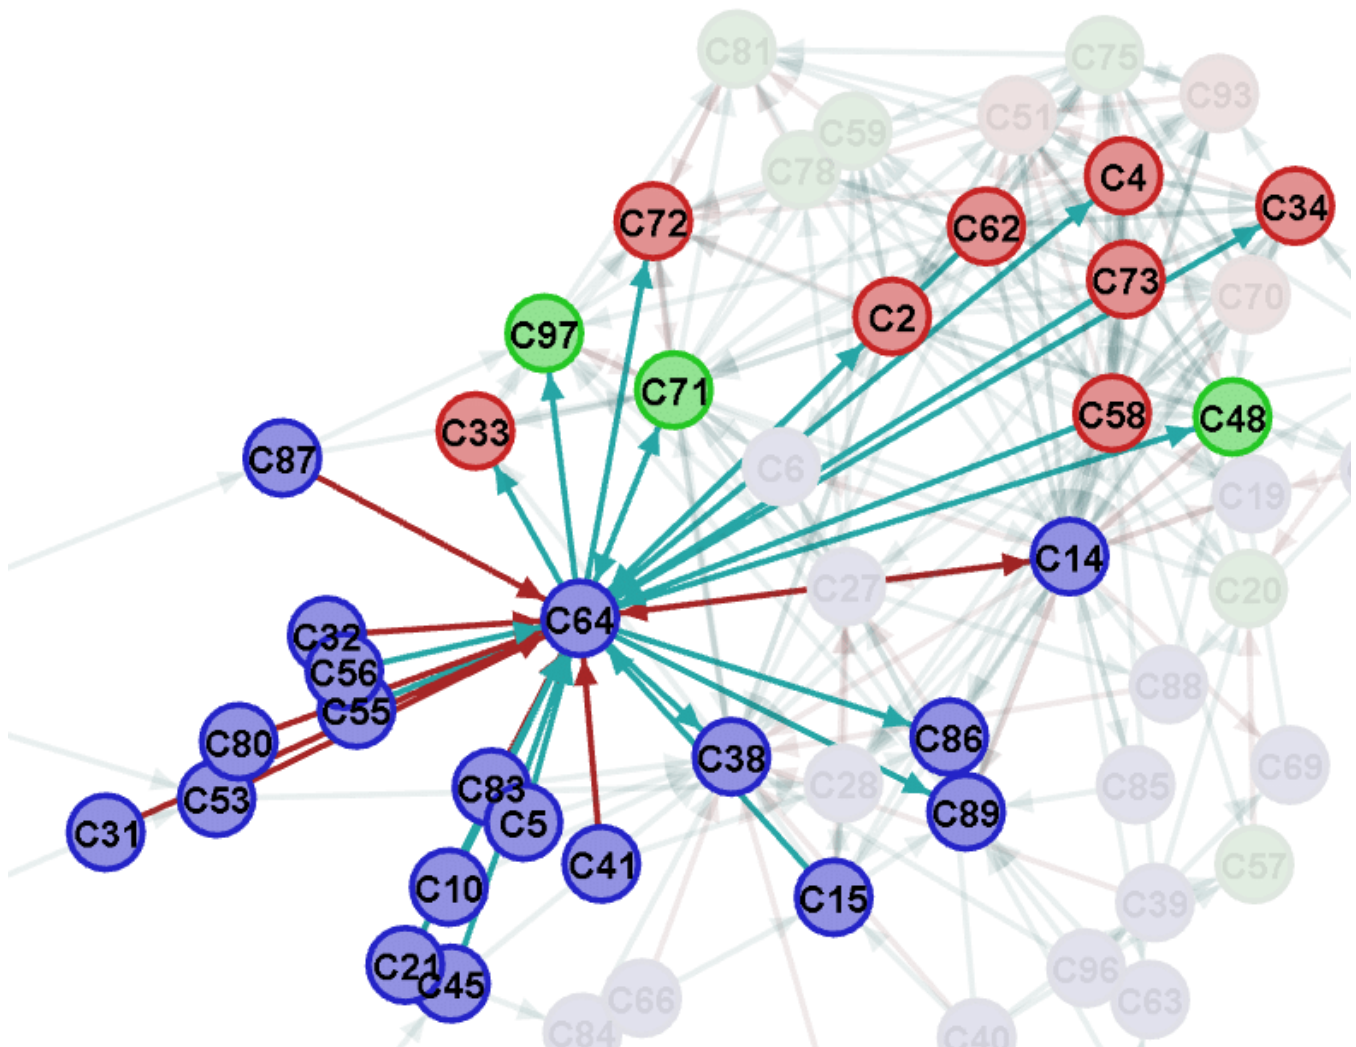

<sup>1</sup> Source: Clegg B, Sohal A, Koh C, Dey P, Bennett D. Manufacturing's Wicked Problems (partially) explained through Social Network Analysis 2014. doi:10.13140/2.1.3660.6240
