# Supplementary material for: Local Dynamics of Collaboration for Maternal, Newborn and Child Health: A Social Network Analysis of Healthcare Providers and Their Managers in Gert Sibande District, South Africa
Source: PubMed Central journal article supplement (PMC9808286; doi:10.34172/ijhpm.2021.106), 2021-09-08
Supplement: ijhpm-11-2135-s002.pdf [file ijhpm-11-2135-s002.pdf]

**Article title:** Local Dynamics of Collaboration for Maternal, Newborn and Child Health: A Social Network Analysis of Healthcare Providers and Their Managers in Gert Sibande District, South Africa

**Journal name:** International Journal of Health Policy and Management (IJHPM)

**Authors' information:** Fidele Kanyimbu Mukinda<sup>1\*</sup>, Sara Van Belle<sup>2</sup>, Helen Schneider<sup>1,3</sup>

<sup>1</sup>School of Public Health, University of the Western Cape, Cape Town, South Africa.

<sup>2</sup>Institute of Tropical Medicine, Antwerp, Belgium.

<sup>3</sup>South African Medical Research Council Health Services to Systems Unit, University of the Western Cape, Cape Town, South Africa.

(\*Corresponding author: [fmukinda@uwc.ac.za](mailto:fmukinda@uwc.ac.za))

**Supplementary file 2.**

**Table S1: Network metrics summary**

| Node metrics         | Know other actors                |                |                | Degree of Communication |                |                |
|----------------------|----------------------------------|----------------|----------------|-------------------------|----------------|----------------|
|                      | District                         | Sub-district 1 | Sub-district 2 | District                | Sub-district 1 | Sub-district 2 |
| *Highest betweenness | DPM1 (1540)                      | MO2 (374)      | CEO3 (110)     | DPM1 (2874)             | MO5 (1210)     | CEO3 (1403)    |
|                      | DCST2 (584)                      | MO5 (324)      | MOMM3 (83)     | NUT1 (1534)             | CEO2 (946)     | NM1 (411)      |
|                      | DCST1 (578)                      | CEO2 (258)     | NM1 (53)       | DCST1 (749)             | OPM1 (369)     | OMP1 (294)     |
|                      | NUT1 (419)                       | CEO1 (192)     | NUT2 (40)      | DHIS1 (336)             | NM4 (224)      | NUT2 (243)     |
|                      | DHIS1 (217)                      | PN19 (174)     | OPM6 (36)      | DCST2 (333)             | MO3 (170)      | MO14 (175)     |
| *Highest in-degree   | <b>Degree of Communication**</b> |                |                | <b>Feedback</b>         |                |                |
|                      | District                         | Sub-district 1 | Sub-district 2 | District                | Sub-district 1 | Sub-district 2 |
|                      | DPM1 (228)                       | OPM1 (156)     | CEO3 (186)     | DCST1 (16)              | DCST2 (12)     | DPM11 (8)      |
|                      | DCST1 (149)                      | CEO2 (135)     | NM1 (117)      | DCST2 (15)              | DCST1 (12)     | OPM8 (7)       |
|                      | DHIS1 (134)                      | MO2 (135)      | NUT2 (99)      | DPM1 (14)               | MOMM2 (10)     | AD PHC (6)     |
|                      | NUT1 (132)                       | MO5 (115)      | OMP1 (63)      | DPM11 (12)              | MO3 (8)        | NM1 (5)        |
|                      | DCST2 (113)                      | MO3 (95)       | MO14 (62)      | DM (9)                  | MO11 (8)       | OMP4 (5)       |
|                      | <b>Advice</b>                    |                |                | <b>Problem-solving</b>  |                |                |
|                      | District                         | Sub-district 1 | Sub-district 2 | District                | Sub-district 1 | Sub-district 2 |
|                      | DCST1 (17)                       | DCST1 (12)     | OPM8 (5)       | DCST1 (14)              | DCST1 (10)     | AD PHC (6)     |
|                      | DCST2 (16)                       | DCST2 (10)     | CEO3 (5)       | DCST2 (13)              | DCST2 (8)      | OPM8 (5)       |
|                      | DPM1 (14)                        | MOMM2 (7)      | AD PHC (5)     | DM (11)                 | MOMM2 (8)      | DPM11 (5)      |
|                      | DPM4 (8)                         | DPM1 (7)       | NUT1 (4)       | DPM1 (11)               | NM2 (8)        | OPM6 (4)       |
|                      | DM (8)                           | NM2 (7)        | DPM4 (4)       | DPM11 (9)               | MO12 (7)       | CEO3 (4)       |
|                      | <b>Emotional support</b>         |                |                | <b>Sharing new idea</b> |                |                |
|                      | District                         | Sub-district 1 | Sub-district 2 | District                | Sub-district 1 | Sub-district 2 |
|                      | DPM1 (6)                         | NM2 (6)        | OPM8 (3)       | DCST1 (13)              | DCST1 (10)     | OPM8 (5)       |
| DM (5)               | MOMM2 (5)                        | NM1 (2)        | DPM1 (11)      | MOMM2 (6)               | DPM11 (5)      |                |
| DCST1 (3)            | MO11 (5)                         | AD PHC (2)     | DM (8)         | MO3 (6)                 | AD PHC (5)     |                |
| DCST3 (3)            | MO2 (4)                          | NUT2 (1)       | DCST2 (7)      | DPM1 (6)                | NM1 (3)        |                |
| DPM5 (2)             | DM (4)                           | DPM4 (1)       | DPM11 (7)      | NM2 (6)                 | CEO3 (3)       |                |

\*Five actors (node code) with the highest metrics (in bracket) are reported. \*\*Weighted degree

Abbreviations: CEO=Chief Executive Officer; DCST=District Clinical Specialist Team; DHIS=District health information system manager; DM=District manager; DPM=District programme manager; MO=Medical officer; MOMM=Medical manager; NM=Nursing services manager; NUT=Nutrition service manager; OMP=Operational manager primary healthcare facility; OPM=Operational manager hospital ward.

**Table S2: Degree of communication by professional interface - Actors with highest betweenness centrality\***

| Cluster 1   |             |             | Cluster 2  |            |        | Cluster 3 |            |            | Cluster 4  |             |            |
|-------------|-------------|-------------|------------|------------|--------|-----------|------------|------------|------------|-------------|------------|
| Doctors     | Nurses      | Others      | Doctors    | Nurses     | Others | Doctors   | Nurses     | Others     | Doctors    | Nurses      | Others     |
| DCST1 (749) | DPM1 (2874) | NUT1 (1534) | MO5 (1517) | NM4 (220)  | -      | MO3 (162) | CEO2 (782) | DHIS3 (71) | MO14 (175) | CEO3 (1403) | NUT2 (99)  |
| DCST2 333)  | DPM11 (241) | DHIS1 (336) | MOCS4 (18) | PN19 (135) | -      | MO2 (150) | OPM1 (514) | NUT3 (0,8) | MOMM3 (15) | NM1 (411)   | DHIS2 (20) |
| -           | DPM2 (109)  | DPM7 (4)    | MO13 (10)  | OPM2 (60)  | -      | MO20 (61) | PN16 (115) | -          | MOMM4 (1)  | OMP1 (294)  | SW (9)     |
| -           | DM (94)     | DPM3 (1)    | MOCS1 (8)  | Nurse (6)  | -      | MO18 (21) | PN15 (81)  | -          | -          | Nurse (98)  | NUT4 (9)   |
| -           | DCST3 (29)  | -           | MO12 (8)   | CEO1 (1)   | -      | MOMM2 (8) | PN17 (13)  | -          | -          | OPM6 (70)   | NUT5 (9)   |

\*Five actors (node code) with the highest betweenness centrality (in bracket) are reported.

Abbreviations: CEO=Chief Executive Officer; DCST=District Clinical Specialist Team; DHIS=District health information system manager; DM=District manager; DPM=District programme manager; MO=Medical officer; MOMM=Medical manager; NM=Nursing services manager; NUT=Nutrition service manager; OMP=Operational manager primary healthcare facility; OPM=Operational manager hospital ward; SW=Social worker.
