# Supplementary material for: Local Dynamics of Collaboration for Maternal, Newborn and Child Health: A Social Network Analysis of Healthcare Providers and Their Managers in Gert Sibande District, South Africa
Source: PubMed Central journal article supplement (PMC9808286; doi:10.34172/ijhpm.2021.106), 2021-09-08
Supplement: ijhpm-11-2135-s003.pdf [file ijhpm-11-2135-s003.pdf]

**Article title:** Local Dynamics of Collaboration for Maternal, Newborn and Child Health: A Social Network Analysis of Healthcare Providers and Their Managers in Gert Sibande District, South Africa

**Journal name:** International Journal of Health Policy and Management (IJHPM)

**Authors' information:** Fidele Kanyimbu Mukinda<sup>1\*</sup>, Sara Van Belle<sup>2</sup>, Helen Schneider<sup>1,3</sup>

<sup>1</sup>School of Public Health, University of the Western Cape, Cape Town, South Africa.

<sup>2</sup>Institute of Tropical Medicine, Antwerp, Belgium.

<sup>3</sup>South African Medical Research Council Health Services to Systems Unit, University of the Western Cape, Cape Town, South Africa.

(\*Corresponding author: [fmukinda@uwc.ac.za](mailto:fmukinda@uwc.ac.za))

**Supplementary file 3.**

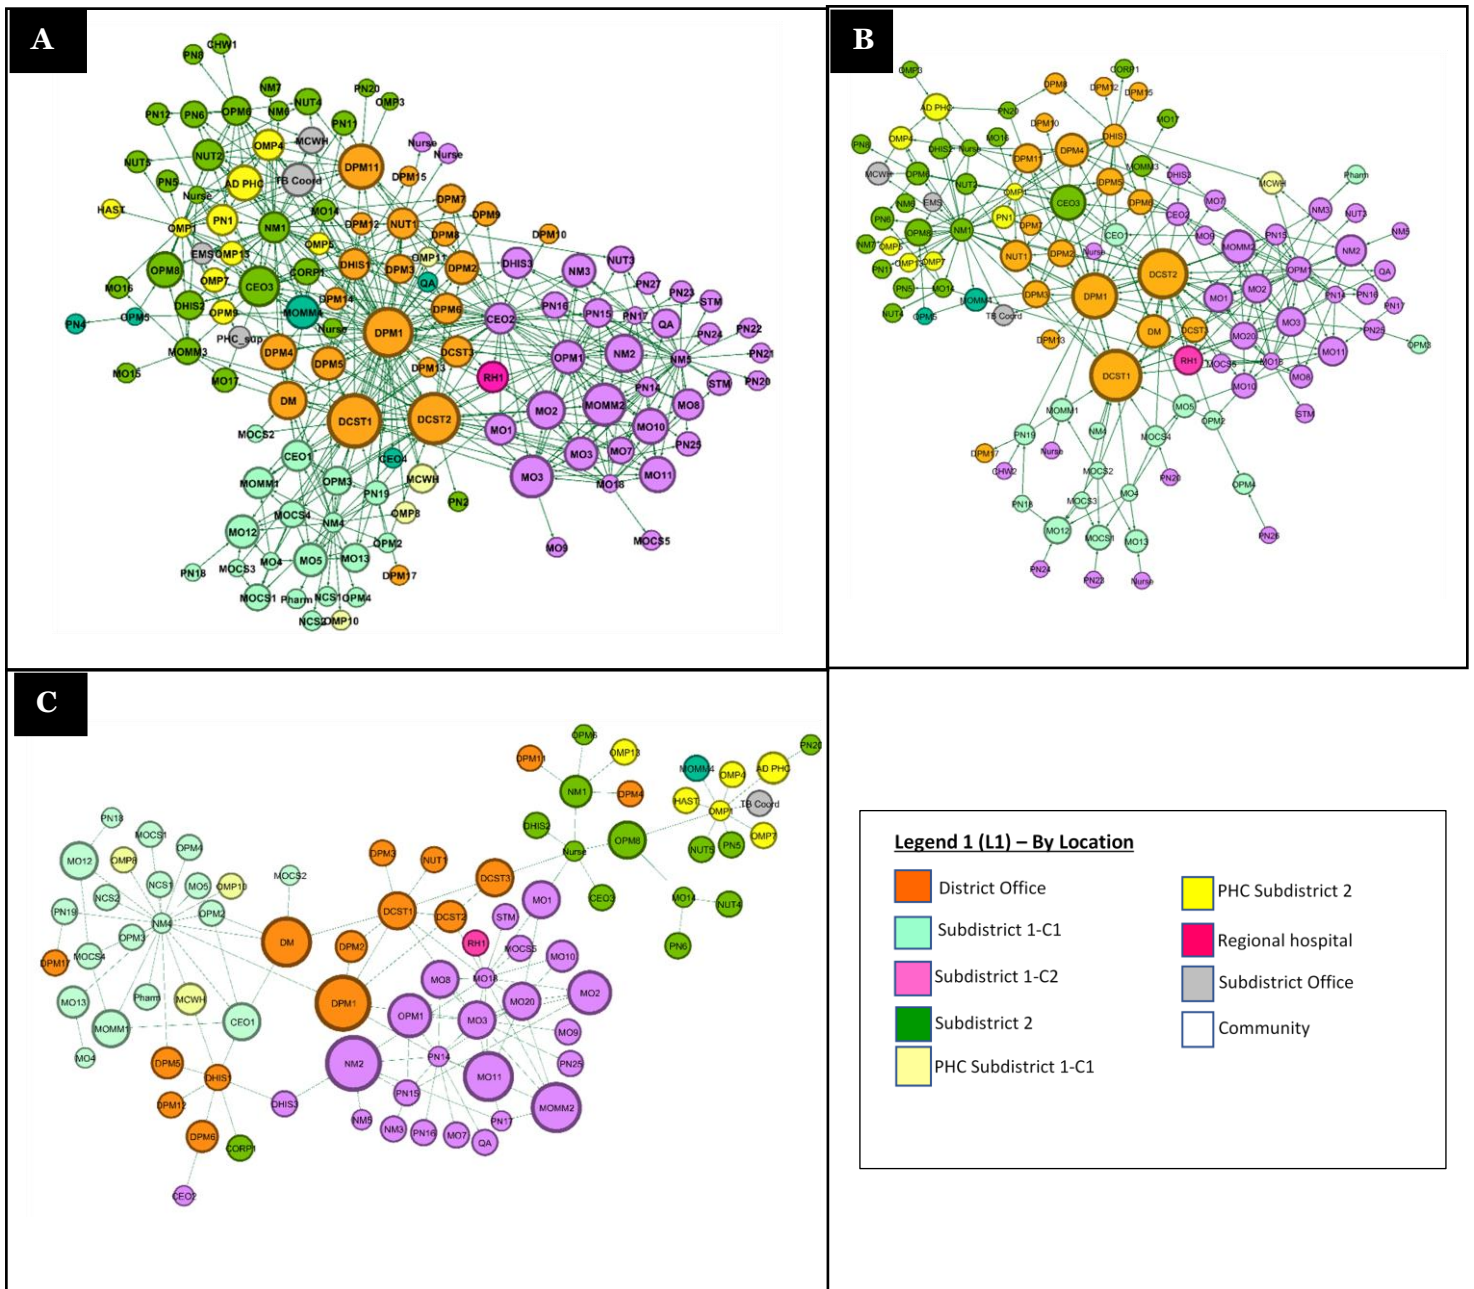

**Figure S1: District level – Feedback (A), Advice (B) and Emotional support (C) networks**

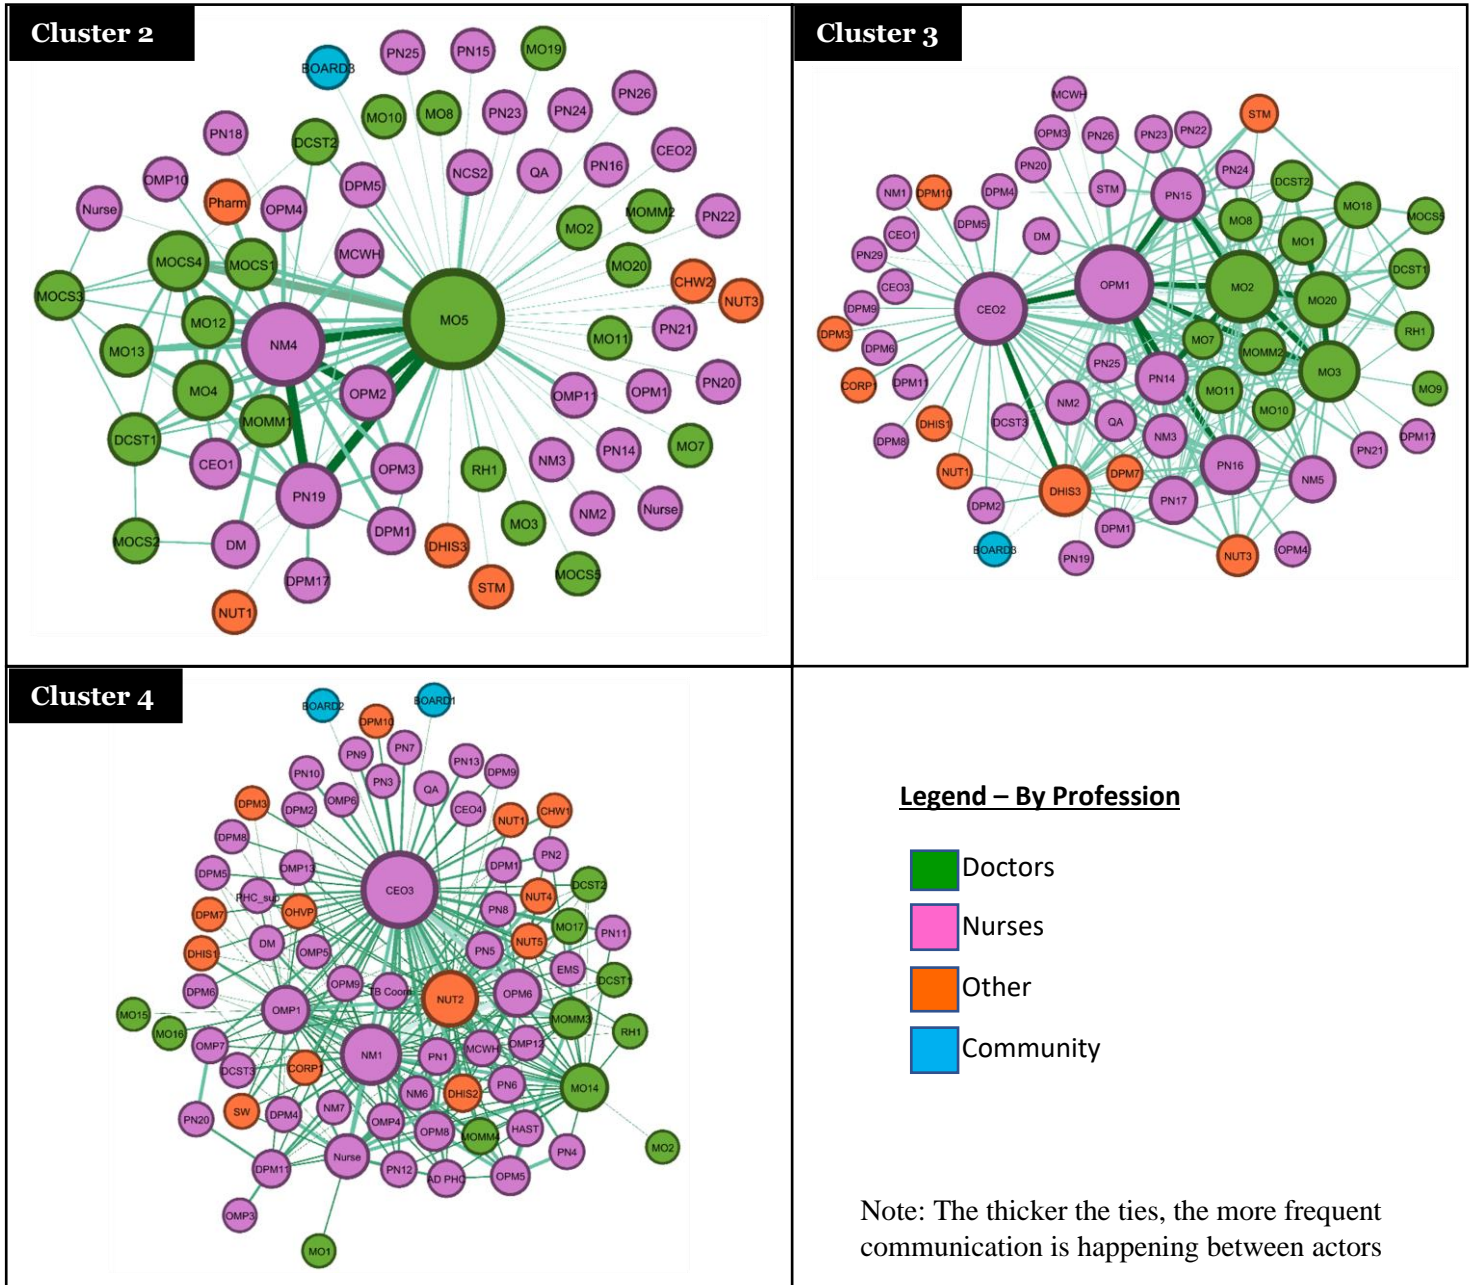

Figure S2: ‘Degree of communication’ network by professional category at sub-district/cluster level

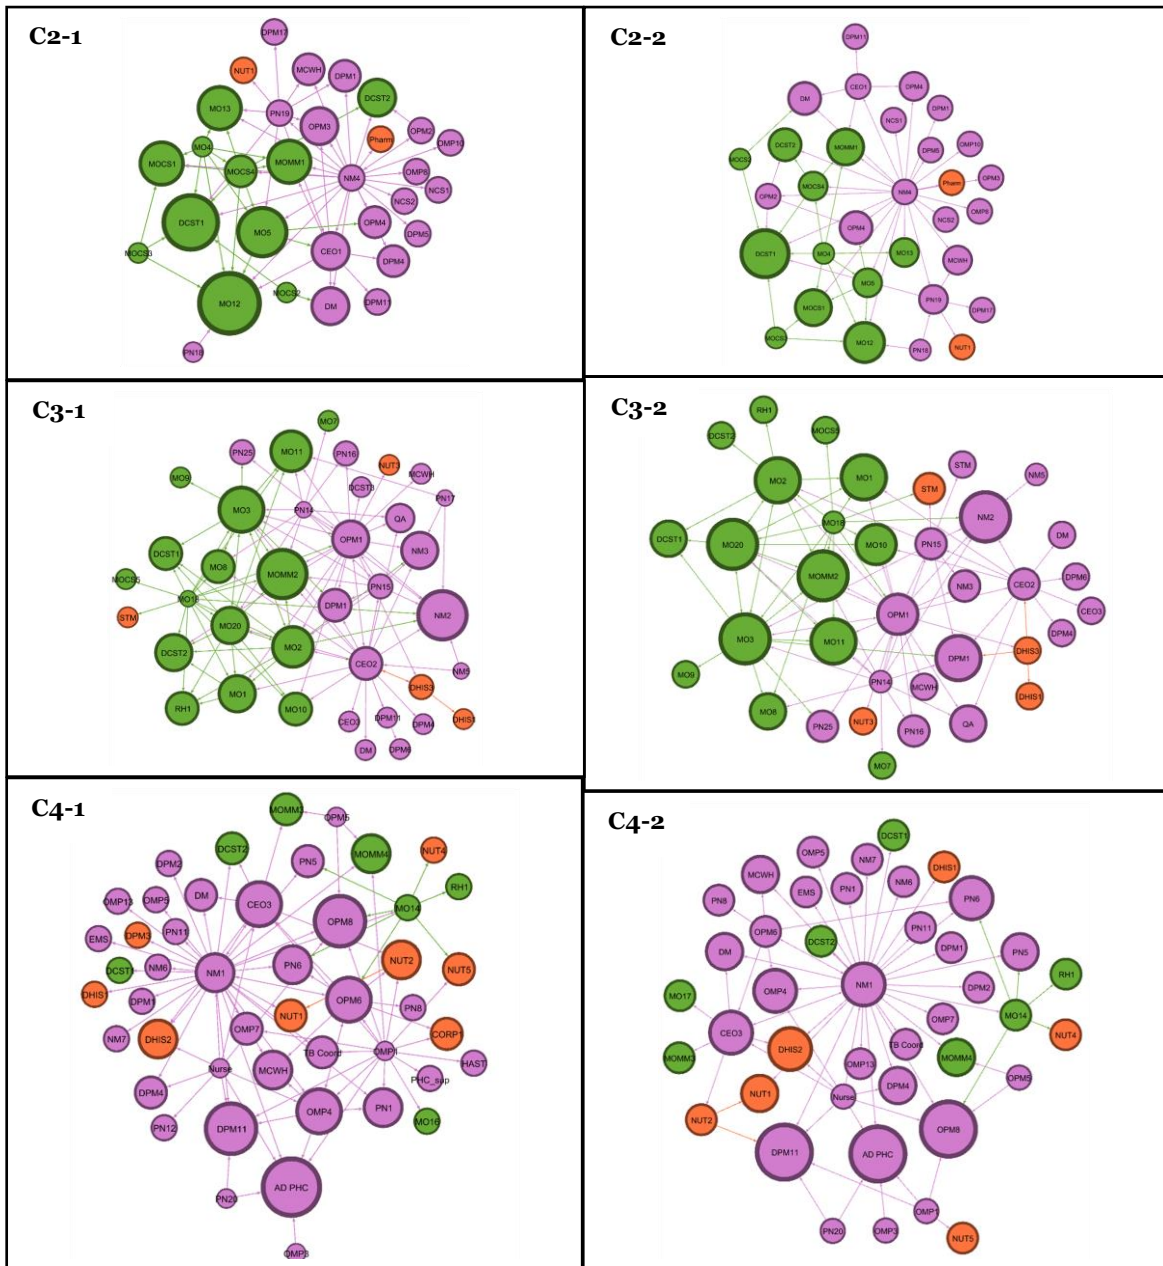

**Legend – By Profession**

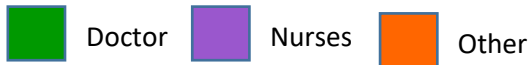

**Figure S3: Sub-district clusters - Problem-solving (C2-1, C3-1, C4-1) and Sharing new idea (C2-2, C3-2, C4-2) networks**
